# Supplementary material
Source: publisher figshare collection journal article supplement (https://frontiersin.figshare.com/ndownloader/files/12400841)
Supplement: Supplementary file [file 12400841]

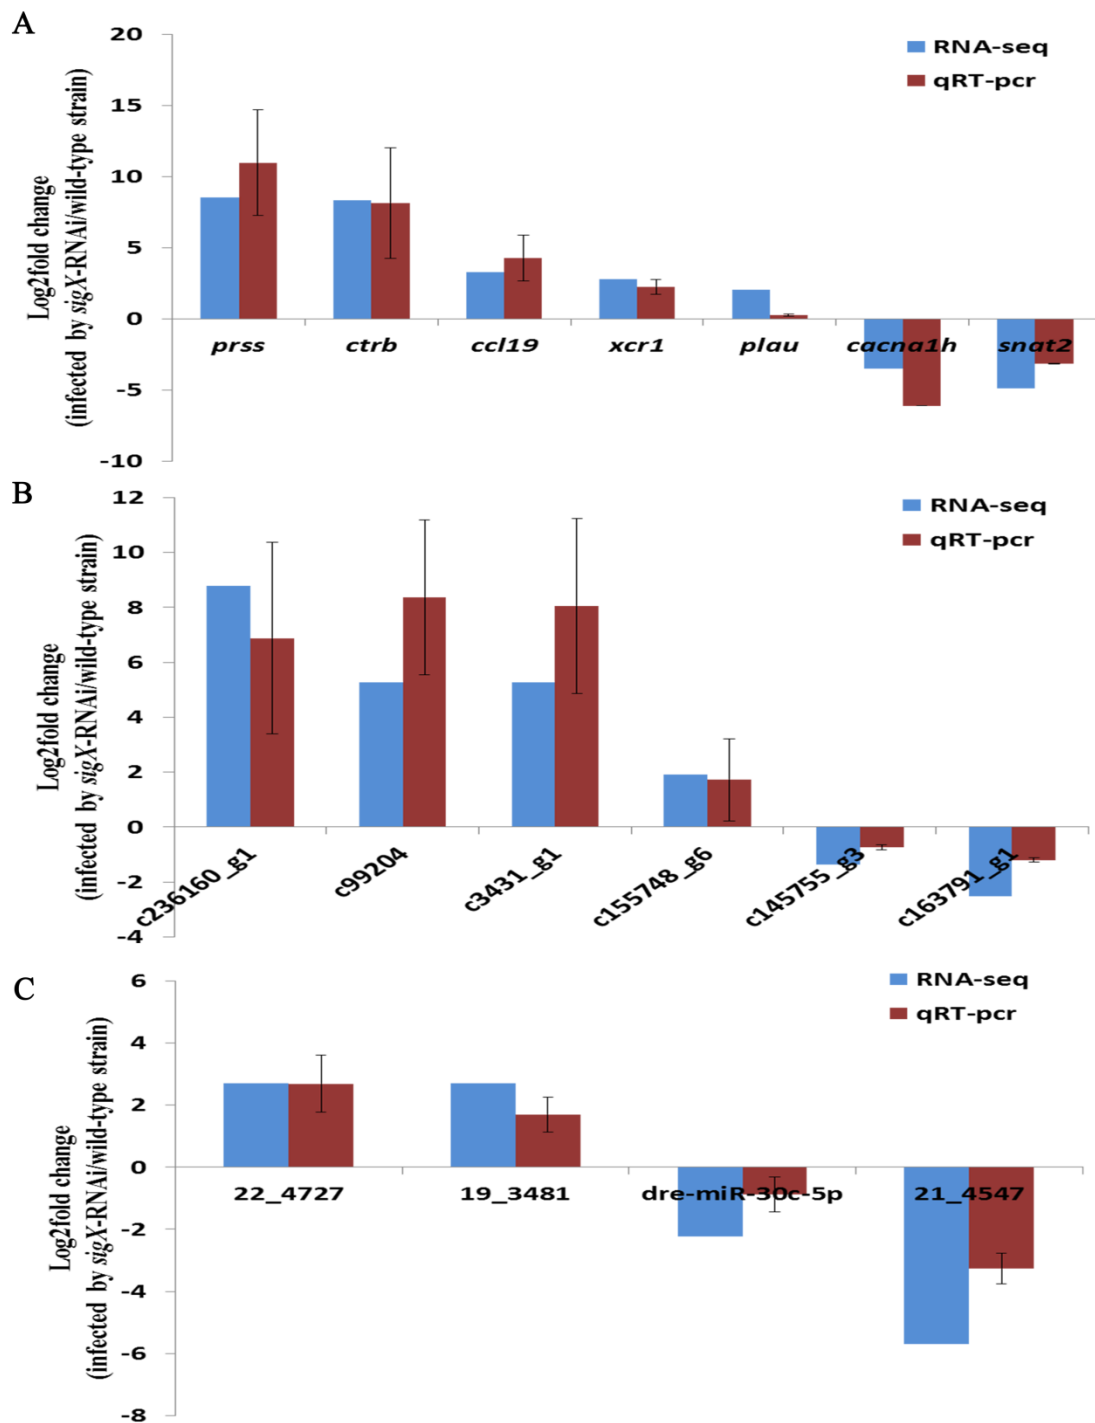

**Supplementary Figure 6 verification of transcriptome data by qRT-PCR.**

Relative changes in abundance of selected (A) mRNA, (B) lncRNA (C) miRNA. qRT-PCR was performed by triple technical repetitions. Red bars: qRT-PCR; blue bars: RNA-seq.
